# Supplementary material for: Capacity-enhanced and kinetic-expedited zinc-ion storage ability in a Zn3V3O8/VO2cathode enabled by heterostructural design
Source: Royal Society of Chemistry journal article supplement (doi:10.1039/d2dt02220f), 2022-01-01
Supplement: d2dt02220f1.pdf [file d2dt02220f1.pdf]

## Supporting information

# Capacity enhanced and kinetic expedited zinc-ion storage ability in $\text{Zn}_3\text{V}_3\text{O}_8/\text{VO}_2$ cathode enabled by heterostructure design

*Linyu Yang*<sup>a, b\*</sup>, *Jikang Jian*<sup>c\*</sup>, *Shuying wang*<sup>a, b\*</sup>, *Shiyu Wang*<sup>c</sup>, *Ablat Abliz*<sup>a, b</sup>,  
*Fengjun Zhao*<sup>d</sup>, *Haibing Li*<sup>e</sup>, *Jiadong Wu*<sup>a, b</sup>, *Yujian Wang*<sup>a, b</sup>

<sup>a</sup> Xinjiang Key Laboratory of Solid State Physics and Devices, Xinjiang University, Urumqi 830046, PR China. E-mail: yanglinyu0222@sina.com

<sup>b</sup> School of physics and technology, Xin Jiang University, Urumqi, Xinjiang 830046, China.

<sup>c</sup> School of Physics and Optoelectronic Engineering, Guangdong University of Technology, Guangzhou 510006, P.R. China.

<sup>d</sup> School of Materials Science and Engineering, Central South University, Changsha, Hunan 410083, China

<sup>e</sup> Xinjiang Uygur Autonomous Region Research Institute of Measurement and Testing, Urumqi 830011, China

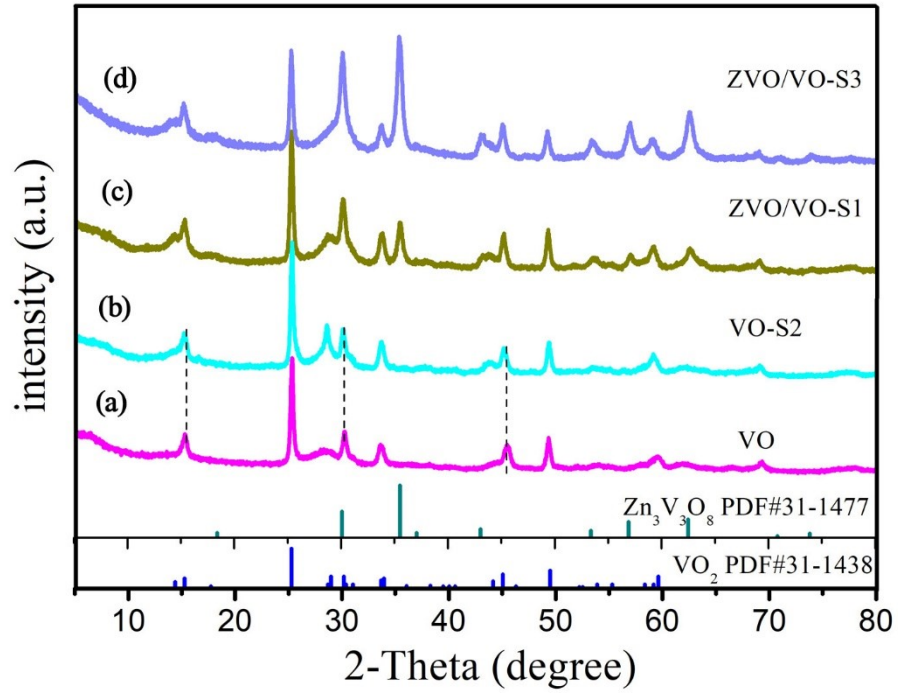

**Figure S1.** XRD pattern of (a)VO, (b) VO-S2, (c) ZVO/VO-S1, (d) ZVO/VO-S3.

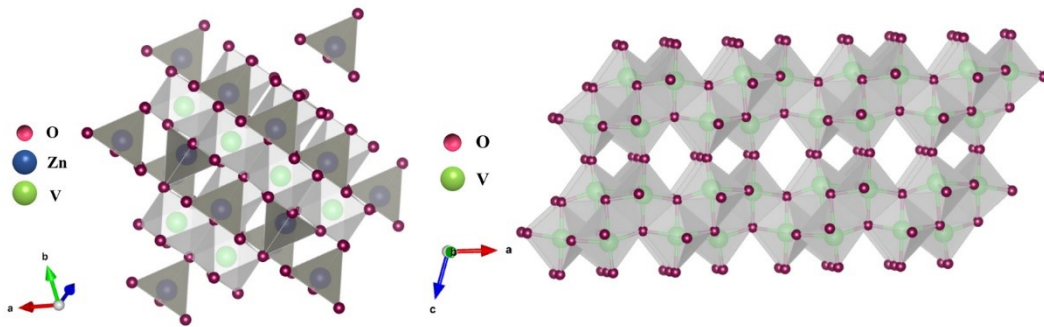

**Figure S2.** The crystal structure of (a) ZVO, and (b) VO.

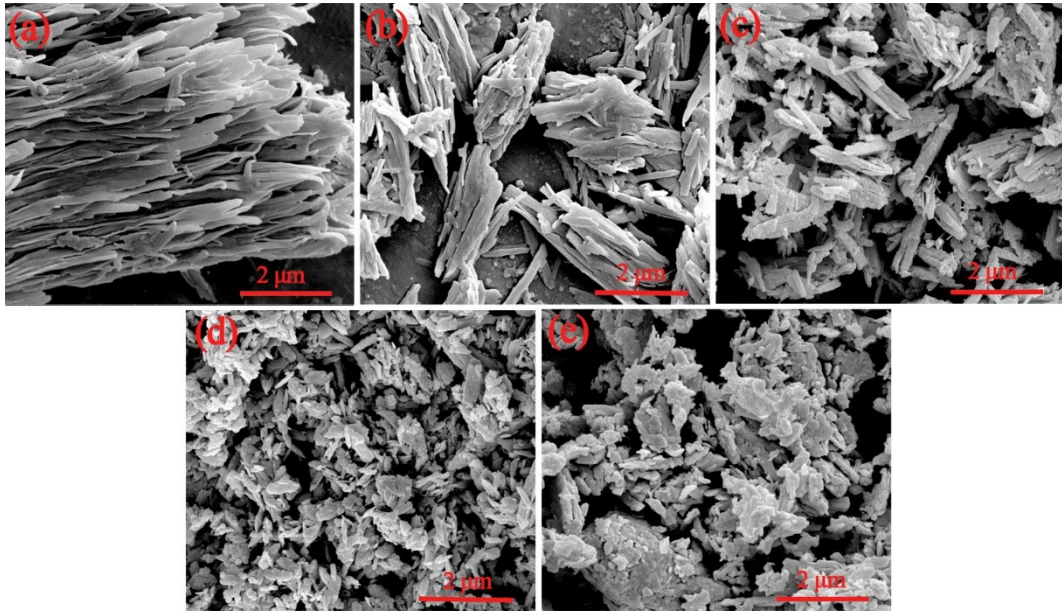

**Figure S3.** SEM images of (a)VO, (b) VO-S2, (c) ZVO/VO-S1, (d) ZVO/VO-S3 and (e) ZVO.

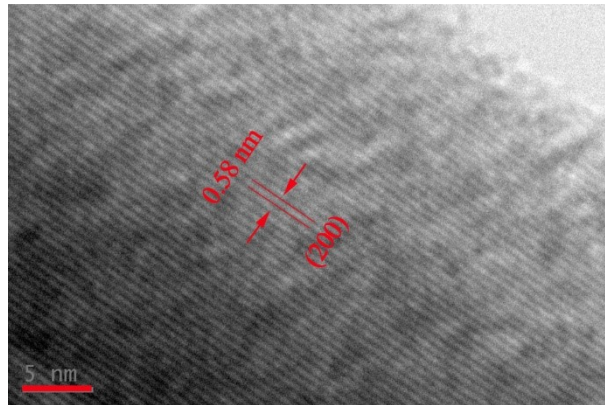

**Figure S4.** HRTEM of VO.

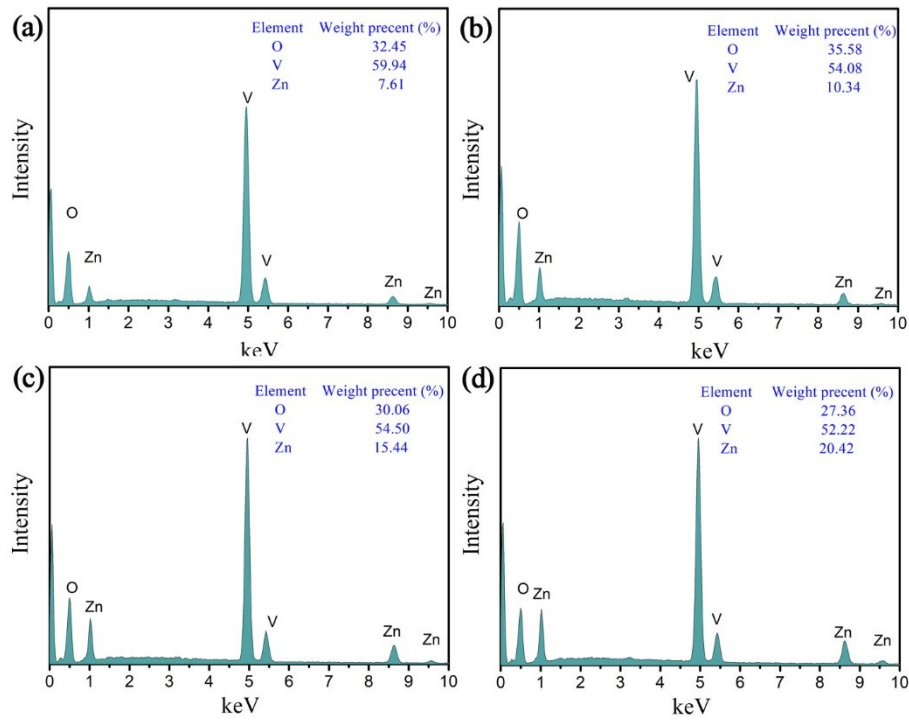

**Figure S5.** EDS of (a) VO-S2, (c) ZVO/VO-S1, (c) ZVO/VO-S2 and (d) ZVO/VO-S3.

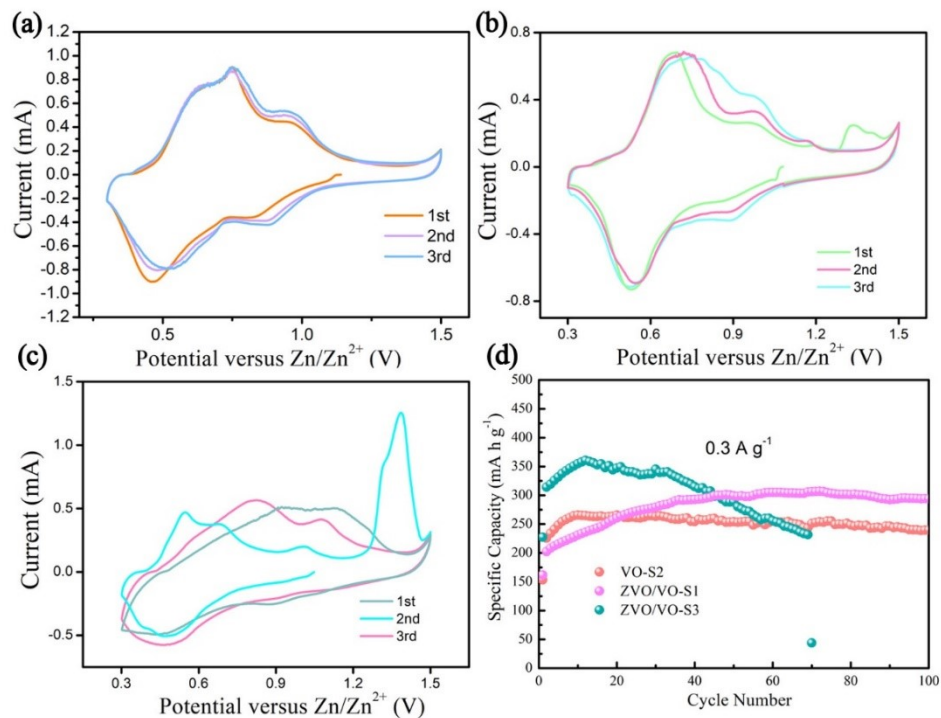

**Figure S6.** CV curves of (a) VO-S2, (b) ZVO/VO-S1, and (c) ZVO/VO-S3, (d) Cycling performance of VO-S2, ZVO/VO-S1, and ZVO/VO-S3 at 0.3 A g<sup>-1</sup>.

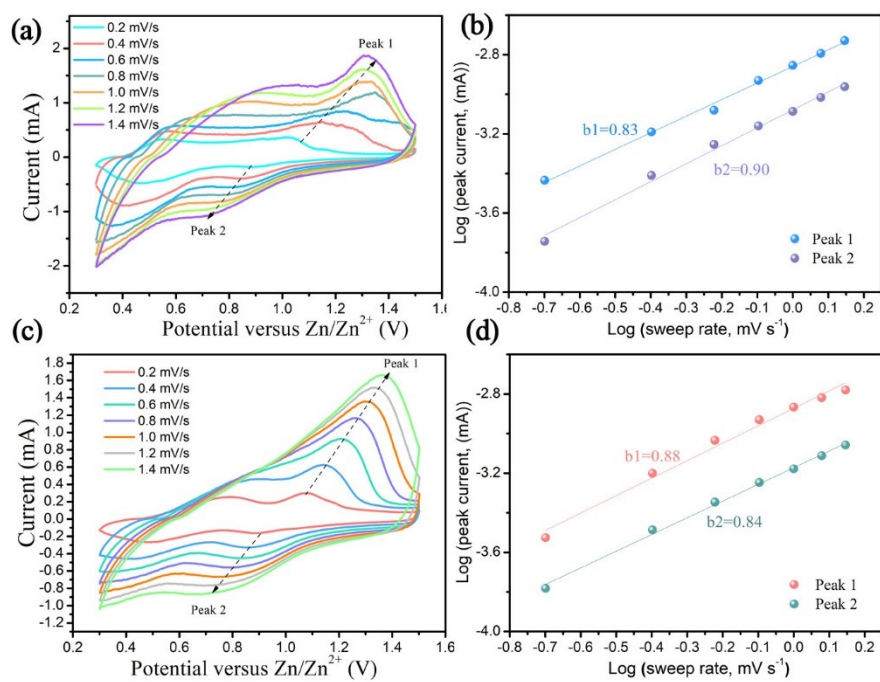

**Figure S7.** (a) CV profiles of the VO electrode from 0.2 to 1.4 mV s<sup>-1</sup>, (b) *b* values calculated by the reduction and oxidation peaks in the CV curves at different scan rates, (c) CV profiles of the ZVO electrode from 0.2 to 1.4 mV s<sup>-1</sup>, (d) *b* values calculated by the reduction and oxidation peaks in the CV curves at different scan rates.

Table S1. The electrochemical properties comparison between ZVO/VO and other reports.

| <b>Cathode materials</b>                                                                 | <b>The range of voltage (V)</b> | <b>Capacity</b>                                                                                                               | <b>Retention/cycles</b>                | <b>Publish date</b> |
|------------------------------------------------------------------------------------------|---------------------------------|-------------------------------------------------------------------------------------------------------------------------------|----------------------------------------|---------------------|
| <b>ZVO/VO</b>                                                                            | <b>0.3-1.5</b>                  | <b>328.4mA h g<sup>-1</sup> (at 0.3 A g<sup>-1</sup>)</b><br><b>198.4 mA h g<sup>-1</sup> (at 3 A g<sup>-1</sup>)</b>         | <b>92.1%/200</b><br><b>90.5%/1000</b>  | <b>This work</b>    |
| <b>Zn<sub>3</sub>V<sub>3</sub>O<sub>8</sub><sup>[1]</sup></b>                            | <b>0.2-1.6</b>                  | <b>261.7 mA h g<sup>-1</sup>(at 0.15 A g<sup>-1</sup>)</b><br><b>192 mA h g<sup>-1</sup>(at 5 A g<sup>-1</sup>)</b>           | <b>78.3%/60</b><br><b>72.6%/2000</b>   | <b>2021</b>         |
| <b>Zn<sub>3</sub>V<sub>3</sub>O<sub>8</sub><sup>[2]</sup></b>                            | <b>0.2-1.7</b>                  | <b>272 mA h g<sup>-1</sup>(at 0.5 A g<sup>-1</sup>)</b><br><b>170 mA h g<sup>-1</sup>(at 2 A g<sup>-1</sup>)</b>              | <b>73.8%/400</b><br><b>74.6%1200</b>   | <b>2021</b>         |
| <b>VO<sub>2</sub><sup>[3]</sup></b>                                                      | <b>0.2-1.4</b>                  | <b>Above 250 mA h g<sup>-1</sup>(at 0.05 A g<sup>-1</sup>)</b><br><b>About 100 mA h g<sup>-1</sup>(at 3 A g<sup>-1</sup>)</b> | <b>85%/100</b><br><b>86%/5000</b>      | <b>2019</b>         |
| <b>VO<sub>2</sub>-rG<sup>[4]</sup></b>                                                   | <b>0.2-1.6</b>                  | <b>466 mA h g<sup>-1</sup>(0.1 A g<sup>-1</sup>)</b><br><b>267 mA h g<sup>-1</sup>(at 10 A g<sup>-1</sup>)</b>                | <b>94.3%/50</b><br><b>100%/5000</b>    | <b>2020</b>         |
| <b>V<sub>3</sub>O<sub>7</sub>/V<sub>2</sub>O<sub>5</sub><sup>[5]</sup></b>               | <b>0.2-1.6</b>                  | <b>225 mA h g<sup>-1</sup>(at 2 A g<sup>-1</sup>)</b><br><b>176 mA h g<sup>-1</sup>(at 5 A g<sup>-1</sup>)</b>                | <b>96.2%/1120</b><br><b>82.6%/6500</b> | <b>2020</b>         |
| <b>NaV<sub>6</sub>O<sub>15</sub></b><br><b>/V<sub>2</sub>O<sub>5</sub><sup>[6]</sup></b> | <b>0.2-1.8</b>                  | <b>390 mA h g<sup>-1</sup>(at 0.3 A g<sup>-1</sup>)</b><br><b>267 mA h g<sup>-1</sup>(at 5 A g<sup>-1</sup>)</b>              | <b>82.8%/150</b><br><b>92.3%/3000</b>  | <b>2021</b>         |



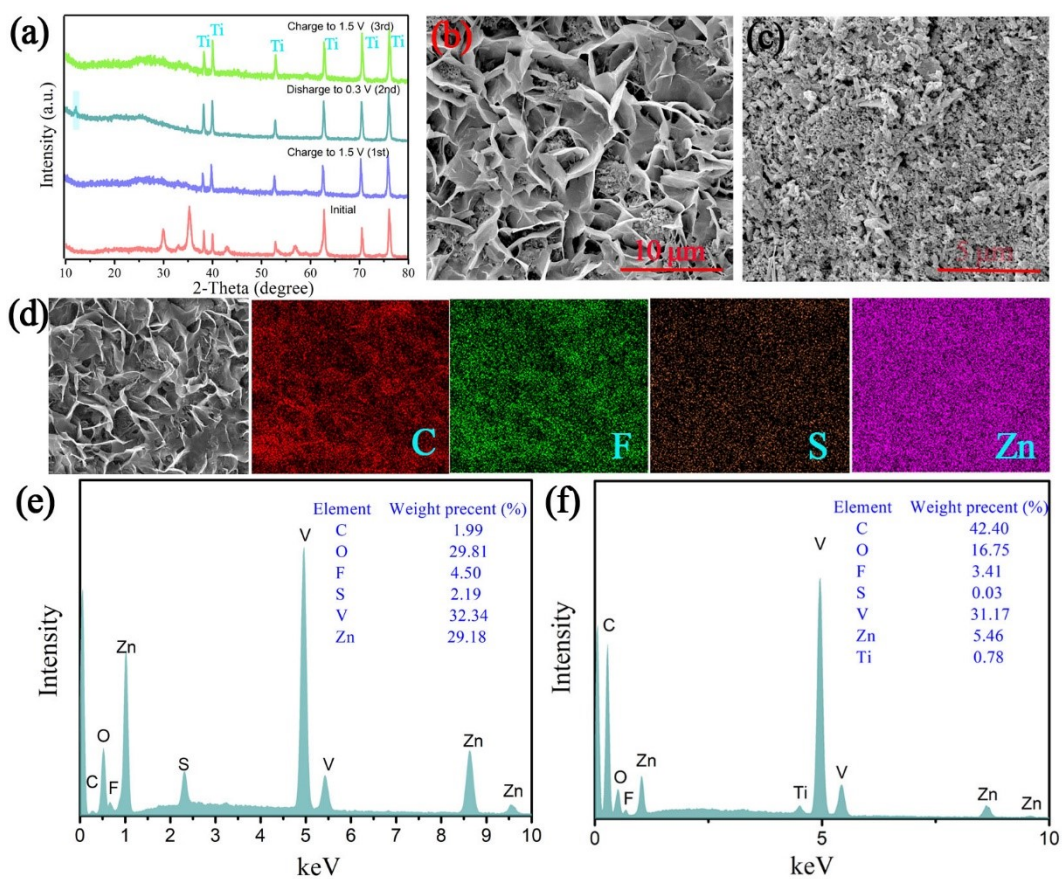

**Figure S8.** (a) Ex-situ XRD of the of ZVO electrode at different discharge/charge state, (b) and (c) SEM image of ZVO electrode discharged to 0.3 V and charged to 1.5 V, respectively. (d) EDS mapping of ZVO electrode discharged to 0.3 V, (e) and (f) EDS results of ZVO electrode discharged to 0.3 V and charged to 1.5 V, respectively.

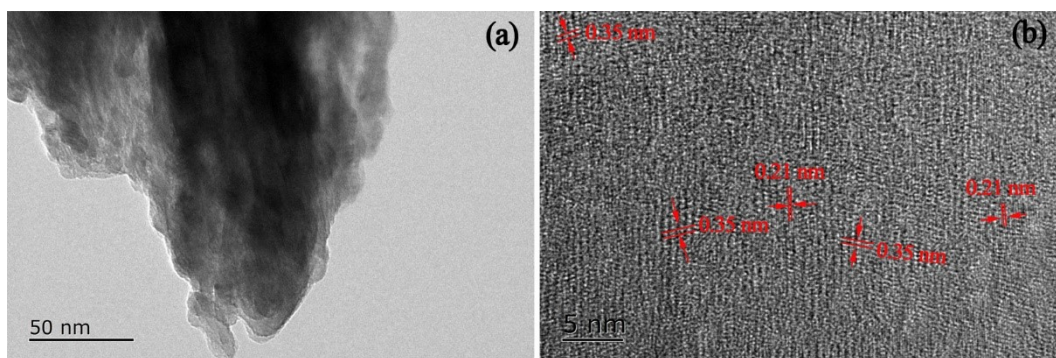

**Figure S9.** (a) Ex-situ TEM and (b) HRTEM images of ZVO electrode charged to 1.5 V.

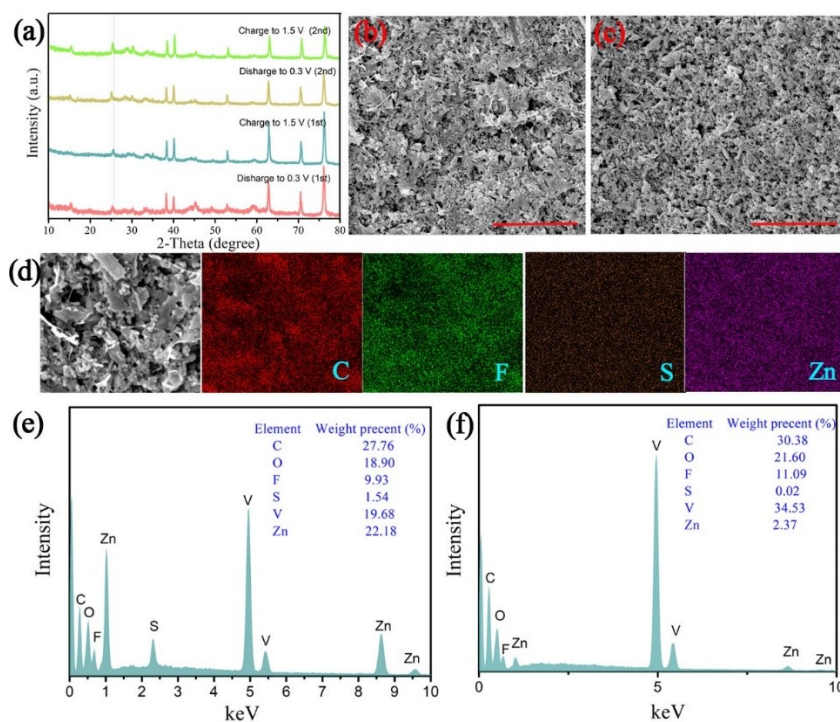

**Figure S10.** (a) Ex-situ XRD of the of VO electrode at different discharge/charge state, (b) and (c) SEM image of VO electrode discharged to 0.3 V and charged to 1.5 V, respectively. (d) EDS mapping of VO electrode discharged to 0.3 V, (e) and (f) EDS results of VO electrode discharged to 0.3 V and charged to 1.5 V, respectively.

$Zn^{2+}$  diffusion coefficients ( $D_H$ ) for VO, ZVO/VO-S1, and ZVO were measured by the GITT method, as present in Figs. 4(d-f). And the galvanostatic charge/discharge



pulses were each 5 min at 200 mA g<sup>-1</sup>, and the relaxation time was 30 min. The Zn<sup>2+</sup> diffusion coefficient can be calculated from equation as follows:

$$D_H = \frac{4}{\pi\tau} \times \left(\frac{m_B \times V_M}{M_B \times S}\right)^2 \times \left(\frac{\Delta E_S}{\Delta E_t}\right)^2, \quad (S1)$$

where  $\tau$  is the charge/discharge time,  $V_m$  is the molar volume of active substance,  $m_B$  is the practical mass of active substance in one electrode piece,  $M_B$  is the relative molecular mass of VO, ZVO/VO-S1, and ZVO,  $S$  is the area of the pole piece,  $\Delta E_s$  represents the change in steady state voltage during a constant current pulse, and  $\Delta E_t$  represents the change in the total voltage during a constant current pulse.

## Reference

- 1 J. Wu, Q. Kuang, K. Zhang, J. Feng, C. Huang, J. Li, Q. Fan, Y. Dong and Y. Zhao, *Energy Storage Mater.*, 2021, **41**, 297–309
- 2 H. Yi, C. Zuo, H. Ren, W. Zhao, Y. Wang, S. Ding, Y. Li, R. Qin, L. Zhou, L. Yao, S. Li, Q. Zhao and F. Pan, *Nanoscale*, 2021, **13**, 14408
- 3 L. N. Chen, Y. S. Ruan, G. B. Zhang, Q. L. Wei, Y. L. Jiang, T. F. Xiong, P. He, W. Yang, M. Y. Yan, Q. Y. An, L. Q. Mai, *Chem. Mater.*, 2019, **31**, 699–706
- 4 H. Luo, B. Wang, F. D. Wu, J. H. Jian, K. Yang, F. Jin, B. Cong, Y. Ning, Y. Zhou, D. L. Wang, H. K. Liu, S. X. Dou, *Nano Energy*, 2021, **81**, 105601
- 5 H. Z. Chen, L. L. Chen, J. L. Meng, Z. H. Yang, J. Wu, Y. Rong, L. Deng, Y. D. Shi, *J. Power Sources*, 2020, **474**, 228569
- 6 L. L. Fan, Z. H. Li, W. M. Kang, B. W. Cheng, *J. Energy Chem.*, 2021, **55**, 25–
